# Supplementary material for: Theoretical studies on POM-based organic–inorganic hybrids containing double D–A1–π–A2 chains for high-performance p-type, dye-sensitized solar cells (DSSCs)
Source: Royal Society of Chemistry journal article supplement (doi:10.1039/c4cp04890c), 2014-12-22
Supplement: c4cp04890c1.pdf [file c4cp04890c1.pdf]

**Theoretical studies on POM-based organic-inorganic hybrids  
containing double D-A1- $\pi$ -A2 chains for high performance p-type  
dye-sensitized solar cells (DSSCs)**

Ting Zhang, Wei Guan, Likai Yan,\* Tengying Ma, Jing Wang and Zhongmin Su\*

*Institute of Functional Material Chemistry, Key Laboratory of Polyoxometalate Science of  
Ministry of Education, Faculty of Chemistry, Northeast Normal University, Changchun 130024, P.  
R. China*

*E-mail: yanlk924@nenu.edu.cn; zmsu@nenu.edu.cn.*

**ELECTRONIC SUPPLEMENTARY INFORMATION**

|    | <b>Contents</b>                                                                                              | <b>Page</b> |
|----|--------------------------------------------------------------------------------------------------------------|-------------|
| S1 | Theoretical background for p-type DSSCs                                                                      | S2          |
| S2 | Molecular orbital diagrams for systems <b>I</b> and <b>II0</b> involved in the dominant electron transitions | S3          |

## S1. Theoretical background for p-type DSSCs

As we known, there are five dominating steps in the work of p-type DSSCs, which are shown in following:

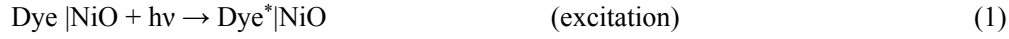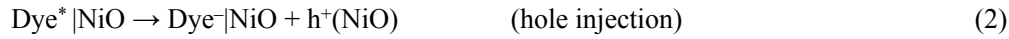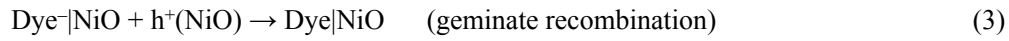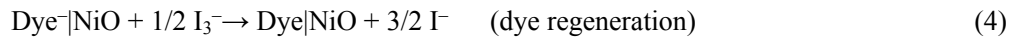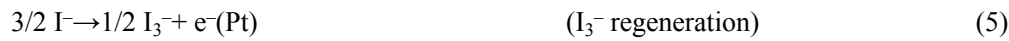

The first step is the dye excitation by light absorption and immediately followed by the hole injection from excited dye into the valence band of the semiconductor. However, if the reduced dye can't react with electrolyte within the charge-separated lifetime, it may recombine with the hole in semiconductor (the third step). Next, the dye is regenerated by electron transfer from the reduced dye to the oxidized species ( $\text{I}_3^-$ ) in electrolyte. Finally, the holes in semiconductor move to the back collector of working electrode and the reduced species ( $\text{I}^-$ ) in electrolyte diffuses to the Pt electrode.

S2. Molecular orbital diagrams for systems **I** and **II0** involved in the dominant electron transitions

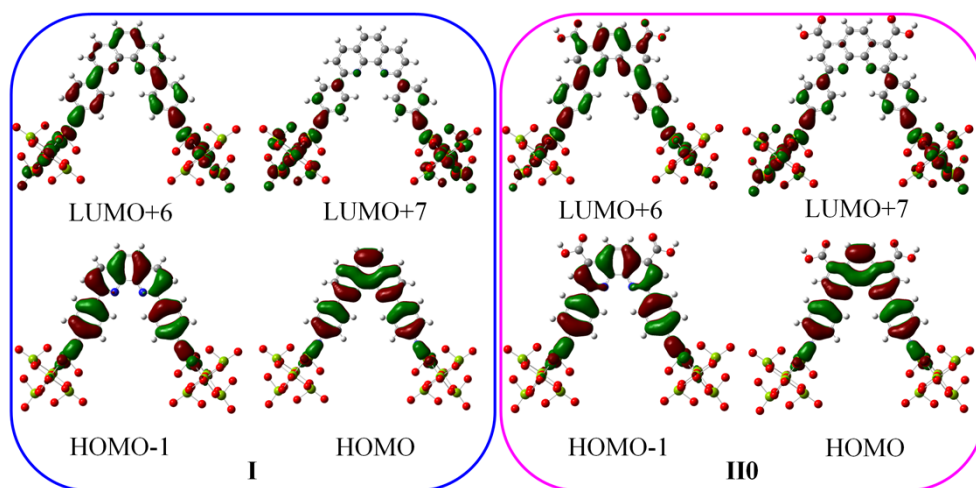

**Fig. S2** Molecular orbital diagrams for systems **I** and **II0** involved in the dominant electron transitions
